# Supplementary material for: A scaling methodology for the Hybrid-Lambda Rotor – Characterization and validation in wind tunnel experiments
Source: Copernicus journal article supplement (doi:10.5194/wes-2024-168), 2024-12-03
Supplement: Supplementary file [file wes-2024-168-AC1-supplement.pdf]

1 Dear Alessandro Croce and Sandrine Aubrun,

2 We have the pleasure of submitting our revised paper “A scaling methodology for the  
3 Hybrid-Lambda Rotor - Characterization and validation in wind tunnel experiments” (wes-  
4 2024-168) for consideration in the journal Wind Energy Science.

5 We are very grateful for the constructive feedback with lots of valuable suggestions from  
6 the editorial team and the reviewers which helped to improve our paper. In short, we  
7 want to highlight the major changes and additions:

- 8 • We structured chapter 2 “Scaling methodology of the Hybrid-Lambda Rotor” with  
9 multiple sub-section-headings. The order now follows the design work-flow.
- 10 • We revised Fig. 1 (Design Flow-Chart), added a legend and introduced all variables.
- 11 • We added contour lines to the wind speed hot-wire measurements (Fig. 13) to  
12 highlight the outer annulus with reduced wake deficits.
- 13 • We clarified the explanation of the control schedule.

14 Furthermore, we have made all the necessary requested changes and have addressed all  
15 comments of the reviewers (printed in black) in the detailed response below.

16 **Our responses to the referees are written in green.**

17 **Reformulated or added phrases for the revised manuscript are cited with blue fonts.**

18 Line, figure and table numbers in our answers are according to the revised manuscript.  
19 Line, figure and table numbers in the referees’ comments are according to the initial  
20 manuscript. All updated figures are appended to this authors’ response.

21 We feel that based on the reviewers comments our paper has been sharpened and  
22 improved, especially in terms of clarity, presentation quality and additional  
23 considerations, and now meets the required standards to be published. If any responses  
24 are unclear, or if you wish for additional changes, please let us know.

25 Sincerely,

26 Daniel Ribnitzky

27 - On behalf of all authors -

28

29 **Referee 1:**

30 Dear Authors, I have reviewed your article and provided my comments below.

31

32 **General comments**

33 The topic of the article, which focuses on the design and experimental characterization of  
34 a scale model of a low specific-rating rotor, is significant for the research community and  
35 aligns with the scope of WES. The methodologies outlined in the article are valuable for  
36 the design of scale model wind turbines, and the results obtained from the testing  
37 campaign enhance the understanding of the operational characteristics of low specific-  
38 rating rotors. This study can contribute to their further development and commercial  
39 viability.

40 The research objectives and hypotheses are clearly defined. The discussion of the  
41 methodology and results is supported by sufficient detail. The article is generally well-  
42 structured.

43 For these reasons, I believe the article merits publication in the WES journal. Prior to  
44 publication, I request the authors address the comments below. Specific suggestions to  
45 enhance the effectiveness of the article are included in the "specific comments" section.  
46 Technical corrections, including typos and improvement suggestions for presentation  
47 quality, are provided in the attached PDF.

48 We appreciate the detailed comments and would like to thank the referee for the positive  
49 feedback.

50 **Specific comments**

51 Introduction. I recommend that the authors include a discussion on the potential impact  
52 of the article, particularly in relation to the development of low-specific-rating rotors and  
53 the scale model testing of wind turbines in general.

54 We thank the referee for this suggestion and added a paragraph about the impact of the  
55 paper:

56 The study presented here, gives valuable insights on aerodynamic effects and design  
57 methods for low-specific-rating wind turbines. This includes the understanding of the flow  
58 in the rotor area as well as in the near-wake of rotors with non-uniform axial induction  
59 distribution. Further, the study can serve as an example for various complex scaling  
60 problems in wind energy research and provides guidelines and inspirations on designing  
61 scaled model turbine blades for aerodynamic investigations in the wind tunnel.

62 Scaling methodology of the Hybrid-Lambda rotor. This section is hard to follow as scaling  
63 requirements are introduced gradually. I recommend restructuring it into: 1) Scaling  
64 constraints, 2) Scale factors, 3) Blade design algorithm, 4) Results of the blade design.  
65 Essentially, divide it into inputs, methodology, and outputs.

66 We improved the readability and understandability of this section by adding headings for  
67 the subsections. We further moved the paragraph about the choice of airfoils to be  
68 included in the inputs section. The added headings are:

69 2.1 Geometric scaling vs. aerodynamic redesign

70 2.2 Scaling objectives

71 2.3 Adaptation of design TSRs

72 2.4 Design and scaling constraints

73 2.5 Inputs to the aerodynamic redesign

74 2.6 Deriving the control schedule and time scaling factor

75 2.7 Verifying the constraints and closing the design loop

76 By doing so, we follow the chronological order within our design workflow which aligns  
77 well with the flowchart in Fig. 1. Starting with theory and background knowledge, moving  
78 on to the scaling objectives which form the basis for the adaptation of the design TSRs.  
79 We then introduce the design flowchart and explain the scaling constraints followed by  
80 the design inputs. Continuing, we can derive the control schedule and only with that being  
81 calculated, we can define the time scaling factor. Finally, the constraints are verified and  
82 the design loop is closed.

83 Figure 1. The diagram is hard to follow due to undefined variables. It should be simplified  
84 and the comparison with MoWiTO1.8 might be removed.

85 We explained all abbreviations and variables that are used in Fig. 2 in the caption and  
86 sorted them alphabetically. We further corrected for the mistake that we used  $\beta$  as a  
87 variable for both, twist and pitch. The latter is now abbreviated with  $\beta_{pitch}$  throughout the  
88 whole paper. We added a legend to the flowchart, explaining the shapes of the symbols.

89 11: "both rotors". It's not clear if the two rotors mentioned here are the two scale models  
90 (Hybrid-Lambda and conventional) or the scale model of the Hybrid-Lambda and its full  
91 scale version.

92 We clarified this by adding the adjective "scaled":

93 The measurement data is supplemented with free-vortex-wake simulations of both scaled  
94 rotors.

95 62: "the large geometric scaling factor". Can you recall its value here?

96 We added the exact scaling factor:

97 First, the large geometric scaling factor of 1/181, second [...]

98 71-76: this paragraph is a bit disconnected from the rest of the introduction. Consider to  
99 remove it and merge its content to the rest of the text.

100 With this paragraph we aim on addressing the impact of this study, as you also kindly  
101 recommended in line 51 of this author response letter. We merged the content with the  
102 additional description of the potential impact.

103 140-141: This sentence should clearly connect with Eq. 1-4, as it forms the basis of the  
104 methodology described in the article.

105 We added a sentence to the beginning of the paragraph to explain the purpose of Eq. 1  
106 to 4:

107 By using Eq. 1-4, we will explain why a reduction in design TSR will increase the Reynolds  
108 number.

109 161: "fulfil the constraints ... number". Can you recall the constrains, i.e. the minimum  
110 allowed chord and Re?

111 The constraints are introduced in the next subsection, so we followed your advice to recall  
112 the exact numbers up front.

113 We found that a design TSR for the light-wind mode works well in order to fulfil the  
114 constraints of minimal chord length (3 cm) and Reynolds number (70000).

115 169-171: "Second, ... in the wind tunnel". Please clarify with examples or explain in more  
116 detail.

117 We reformulated and added an explanation:

118 Second, the transition from the light-wind to the strong-wind mode at constant rotational  
119 speed will expand over a wider range of wind speeds, if the design TSRs are further apart.  
120 [...] This opens up more opportunities for control-related investigations in the wind tunnel  
121 that focus on the transition between the operating modes.

122 192: "first tower eigenfrequency". Report the value.

123 We added the value:

124 It is constrained by the first tower eigenfrequency (6.7 Hz) at the lower end, [...]

125 210-211. Can you briefly explain how the control strategy works?

126 We added an explanation on how the control strategy is derived:

127 Now, the constraint of flapwise RBM is applied and the wind speed is calculated at which  
128 the limiting loads are reached ( $u_{ts}$ ) which is defined as the start of the transition region.  
129 The control strategy, i.e. rotational speed and pitch angle over wind speed, as shown in  
130 Fig. 4 for the final scaled design, is derived as follows. For wind speeds greater than  $u_{ts}$   
131 the rotational speed is kept constant until  $\lambda_{SW}$  is reached. Then the rotational speed  
132 follows  $\lambda_{SW}$  until rated wind speed. The pitch angle is set in order to constrain the RBM  
133 below rated wind speed with the given operational TSRs.

134 215-216. This statement is unclear. There is only one time scale. It can be stated that the  
135 maximum rotor speed is not scaled in relation to the maximum rotor speed of the full-  
136 scale turbine.

137 We clarified this and reformulated:

138 Now, the wind speed at which the transition to the strong-wind mode starts,  $u_{ts}$ , and when  
139 it ends,  $u_{te}$ , are known, as well as the respective pitch angles. Since most of the  
140 measurements are performed at those two wind speeds and with the respective  
141 rotational speed,  $\omega_{tran}$ , we define the time scaling factor as [...]. Note, that the maximum  
142 rotational speed of 600 rpm is set by hardware constraints and is not exactly true to scale  
143 compared with the full-scale model.

144 226-228. To provide clear guidance, it is recommended to avoid asking open-ended  
145 questions and instead offer definitive answers.

146 We added a sentence to emphasise that those questions form the design check at the end  
147 of the iteration process. Additionally, we added to each question a reference to the  
148 respective figure in order to provide the answer to the questions.

149 [...] and we can verify the scaling objectives as follows. Is the axial induction distribution  
150 from the full-scale rotor reasonably matched (Fig. 6a)? Is the change in the angle of attack  
151 distribution reasonable when switching the operating modes (Fig. 6b)? Is the constraint  
152 for the Reynolds number achieved (see Fig. 5)? If one of these objectives is not met, the  
153 design optimization loop is closed by re-tuning the input parameters and calculating the  
154 next design iteration.

155 Figure 6. Can you add the constrains to the plots with horizontal lines?

156 The objective for the axial induction is to match the spanwise distribution from the full-  
157 scale model in the two operating modes. Consequently, there is no constraint. For the  
158 angle of attack, it is not possible to match the distribution exactly, since the low Reynolds  
159 number airfoils operate at lower angles of attack. However, the characteristic tilting when  
160 switching between the operating modes should be replicated. The constraint would be  
161 the stall angle. However, this constraint is not active, since we operate at low angles of  
162 attack.

163 288: "Here". In this study or a cited one?

164 The statement is valid for the cited reference and for our study. We replaced "here" with:

165 According to this method, the axial and tangential velocity components are probed in the  
166 bisectrix of two blades [...].

167 394-395: "as we aimed ... blade design". How does this goal influence the tuning of viscous  
168 diffusion in OLAF? Please explain.

169 By reducing the core spread eddy viscosity, we can simulate a wake that convects freely  
170 for multiple diameters downstream. The results give a better representation of the impact

171 of the blade design, because it is not overshadowed by viscous diffusion. We  
172 reformulated:

173 We aimed for a representation of an undisturbed wake, focusing on the effects that result  
174 from the aerodynamic blade design. Consequently, no tower shadow model is used and  
175 the core spread eddy viscosity (viscous diffusion parameter) is set to 100, in order to allow  
176 for a free convection of the wake for multiple diameters downstream distance.

177 409: "only a small portion of the results". How did you choose which results to plot and  
178 which to discard?

179 We chose to plot the pitch angle for the highest power coefficient and additionally an  
180 equidistant spacing of pitch angles, covering the entire measurement matrix. For each  
181 pitch angle always the entire range of TSRs is plotted.

182 415: "with a considerable offset". Could this offset be due to thrust being estimated from  
183 the tower base bending moment and requiring corrections for nacelle and tower drag,  
184 making it less certain than the torque (power) measurement?

185 We explain the correction model for the aerodynamic tower drag in Sect. 3.3. These  
186 correction models are already applied to the data, however the offset presented in Fig. 8b  
187 remains. We added a note about the correction model to the results section:

188 Although correction models for the tower drag are applied, as explained in Sect. 3.3, an  
189 offset in the thrust coefficient of about 13% is present for the operating point with  
190 maximal  $c_p$ .

191 Eq 14: "My". Could you please clarify what "My" refers to? Is it the bending moment of  
192 individual blades that have been measured using strain gauges?

193 Yes, this is correct. We missed to introduce this variable. Thank you for pointing us at this.  
194 We added:

195 The measured flapwise RBM ( $M_y$ ) are in good agreement with the simulations.

196 420: "the measured flapwise RBM are in good agreement with the simulations". Have you  
197 estimated rotor thrust from blade-root bending moment? It might compare better with  
198 simulations than the tower base moment estimate.

199 We tried the proposed method without seeing major improvements. To do so, we need  
200 to know the lever arm of the resulting bending force on the blade. To estimate the lever  
201 arm, we used the LDA measurements of the axial induction distribution, but those are  
202 only available for the LW and SW operating modes (i.e. two combinations of TSR and  
203 pitch). A further drawback of the LDA measurements is that not enough measurement  
204 positions are available close to the root and the blade tip and the data needs to be  
205 extrapolated. The thrust can then be calculated by either summing up the discrete axial  
206 force distribution (derived from the axial induction measurements), or by dividing the  
207 measured RBM by the derived lever arm. As an alternative, the lever arm can be derived  
208 from the BEM simulations.

209 In summary, the confidence in the suggested analysis is not very high, since we need to  
210 extrapolate the axial induction distribution towards the blade root and tip and we can  
211 only probe two operating points. Further, it is questionable if the openFAST simulations  
212 should be the absolute reference, since openFAST assumes independent blade elements  
213 and the effects due to the non-uniform loading are not captured. We therefore don't  
214 believe this analysis will add much clarification to the paper and decided not to include it.  
215 We clearly point out the offset in the thrust measurements in the results section, line 427-  
216 429.

217 436-465. This discussion should precede the LDA measurement results. Condense the  
218 FVW simulation results (e.g., using Fig. 11) to show that the BEM model's 2D flow  
219 assumption is invalid in the blending region, explaining the poor agreement between BEM  
220 and measurements there.

221 We added a short explanation upfront to the LDA measurement results, referring to the  
222 subsequent discussion on the 3-dimensionality of the flow:

223 However, the steep gradients in the blending region of the blade design are not captured  
224 by the LDA measurements. The measurements show a smeared out and less steep  
225 gradient at  $\frac{r}{R} \approx 0.75$ . Since the flow in the rotor plane is 3-dimensional, the assumption of  
226 independent blade elements in the BEM theory is invalid, and the gradients can not be  
227 captured by the BEM theory. The radial velocity components are further addressed in the  
228 next paragraph.

229 485. You should clarify that the shear layer is between the wind tunnel jet and the still air  
230 around the nozzle.

231 We added a clarification:

232 The hot-wire measurements are performed in the open jet configuration of the wind  
233 tunnel, as explained in Sect. 3.1. This means, there is a shear layer between the wind  
234 tunnel jet and the still air around the nozzle. For large distances to the wind tunnel nozzle,  
235 there is an unavoidable interaction of the wind tunnel shear layer with the wake of the  
236 turbine.

237 489-490: "A major advantage ... operating modes". Can you relate this discussion to the  
238 control schedule shown in Fig. 4?

239 We inserted a reference to the control schedule:

240 When the wind speed increases and the rotor shifts to strong-wind mode and further to  
241 rated conditions, the pitch angle is increased as shown in the control schedule in Fig. 4.  
242 Consequently, the thrust coefficient is reduced, the wake deficits are greatly decreased  
243 (see also Fig. 14) and [...].

244 496: "leads to an outer annulus with reduced wake deficits". Could you please highlight it  
245 in the figure by delineating the edges of the annulus?

246 We added contour lines to Fig. 13 and mentioned it in the text:

247 The low-induction design of the outer 30% of the blades leads to an outer annulus with  
248 reduced wake deficits which is highlighted in Fig. 13 with the contour lines.

249 504-505: “to a second shear layer at the boarder to the inner wake core with lower wind  
250 speeds” Can you highlight it in the figure?

251 We added arrows to Fig. 13 pointing at the second shear layer and explained it  
252 accordingly:

253 The outer annulus with reduced wake deficits leads to a second shear layer at the boarder  
254 to the inner wake core with lower wind speeds. This is highlighted by the black arrows in  
255 Fig. 13, showing the local turbulence intensity, which is defined [...].

256 504-517. Are two shear layers expected in the Hybrid-Lambda rotor based on prior  
257 numerical studies? If so, how do the measurements align with the numerical results?

258 Yes, the second shear layer was also observed in FVW and LES simulations of the full-scale  
259 rotor (Ribnitzky et al., 2023) and in the FVW simulations on the model turbine shown in  
260 Fig. 15. This is already addressed in line 561-566. The measurement results are further  
261 compared to the FVW simulations in line 552-557.

262 Figure 13. The text in this figure is very small. Please, increase it.

263 We increased the font size in Fig. 13.

264 542. Please add a sentence explaining how the assumptions of the FVW model relate to  
265 the experimental conditions. If I understood the text properly, clarify that the results from  
266 the FVW model are useful for indicating the location of vorticity but that the strength  
267 estimated by the FVW model should not be directly compared to the strength observed  
268 in the experiment.

269 We added a sentence to indicate why we chose a simulation set-up that leads to an  
270 undisturbed wake. However, please note that the strength of the vorticity from the FVW  
271 simulations cannot be directly compared to our measurement results. We only measured  
272 with one-dimensional hot-wires and the vorticity cannot be derived from one velocity  
273 component. This is why the turbulence intensity is shown in Fig. 13.

274 The FVW simulations are set up in a way to produce a wake that is as undisturbed as  
275 possible, e.g. using laminar and uniform inflow and a relatively low core spread eddy  
276 viscosity. This simulation set-up is chosen to identify a clear representation of the vortex  
277 rings and their positions. Consequently, the vortex systems do not break up noticeably  
278 and the interaction between the inner and outer ring of vortices is rather low.

279 Figure 15. Please add titles to the subplots to indicate if they refer to Convention or Hybrid  
280 Lambda rotors.

281 We added abbreviations to the subplots to clarify this.

282 589: “must be considered critically”. Not clear what you mean.



283 We adjusted the wording to specify:

284 [...] but when designing a blade with such strong gradients along the blade span one  
285 cannot rely solely on the BEM theory.

286 598: "are very similar". Could you please clarify the parameters? Are we discussing velocity,  
287 radial extension, or another aspect?

288 We reformulated to clarify this:

289 The outer wake annulus behaves very similarly across the simulations and the  
290 measurements, considering the wind speed distribution and turbulence intensities.

291 624-629: I think this paragraph belongs to the conclusions.

292 We moved the outlook to the conclusion section, as suggested.

293 Data availability. Can you provide any measurements or numerical models? This is  
294 encouraged by the journal.

295 We added the section data availability. The link to the repository will be added during the  
296 typesetting process.

297 For the Hybrid-Lambda model turbine, we provide the blade geometry as CAD-file and the  
298 turbine simulation model for OpenFAST. We further provide the mean wind speeds and  
299 turbulence intensities from the hot-wire measurements in the wake as shown in Fig. 13.

### 300 **Technical corrections**

301 See attached pdf file.

302 We thank the reviewer for the many detailed and helpful technical suggestions and  
303 implemented the changes where applicable.

304

305

### 306 **Referee 2:**

307 **Review of the manuscript WES-2024-168 "A scaling methodology for the Hybrid-**  
308 **Lambda Rotor -Characterization and validation in wind tunnel experiments", by**  
309 **Daniel Ribnitzky, Vlaho Petrovic and Martin Kuhn.**

310

311 The paper aims to develop a scaling methodology for the Hybrid-Lambda Rotor and  
312 validate it through wind tunnel experiments. The Hybrid-Lambda Rotor is designed to  
313 increase power output in light winds and limit loads on long, slender rotor blades in strong  
314 winds. The rotor concept is scaled to a wind tunnel size (1.8 meters in diameter) and tested  
315 under controlled inflow conditions. The experiments involve measuring axial induction in  
316 the rotor plane and characterizing the wake using a Laser-Doppler-Anemometer and a

317 hot-wire rig. The results show that the rotor's low-induction design reduces load  
318 overshoots in gust events and reveals unique flow patterns, such as increased radial flow  
319 components and reduced wake deficits. The study provides valuable insights into the  
320 aerodynamic performance of the Hybrid-Lambda Rotor and its potential benefits for  
321 offshore wind turbines. The experimental data supports the effectiveness of the rotor  
322 design in both light and strong wind conditions, making it a promising concept for future  
323 wind energy applications. The manuscript is well-written, and the arguments are well  
324 presented. I do not have any major comments regarding the manuscript. Please find some  
325 specific comments below:

326 We thank the referee for the very positive feedback on the manuscript.

327 **Page 7, Line 170:** First, we ... in the wind tunnel. Could you please also show the angle of  
328 attack redistribution for 7.5->6.7 and 7.5->6 in a plot. In addition, please report the wind  
329 speeds for LW to SW transitions for both TSR shifts.

330 The changes in the inflow angle for the mentioned TSR reductions (7.5 → 6.7 and 7.5 → 6)  
331 are already plotted in Fig. 2. We further added the corresponding wind speeds to the  
332 description.

333 For instance, with the start of the transition region at  $u_{ts} = 6.3 \text{ m s}^{-1}$ , the tip-speed ratio  
334 in the strong-wind mode of  $\lambda_{d,SW} = 6.7$  would lead to the end of the transition region at  
335  $u_{te} = 7.0 \text{ m s}^{-1}$ , whereas a lower tip-speed ratio  $\lambda_{d,SW} = 6$  would result in a wider  
336 transition region with  $u_{te} = 7.9 \text{ m s}^{-1}$ .

337 **Page 8, line 188:** This is the...steady-state assumption. Could you please justify the load  
338 level of 10.6 Nm for root bending moment or add a reference?

339 It is derived by scaling the maximum value of the flapwise blade root bending moment  
340 from the full-scale Hybrid-Lambda turbine. We added a clarification:

341 In theory, the maximum flapwise blade root bending moment (RBM) scales with  $n_t^3$ . With  
342 a maximum value for steady inflow of 62.9 MNm for the full-scale model this would result  
343 in a value of 10.6 Nm for the wind tunnel model.

344 **Page 20, line 430:** the Measurements show... outer 30%. Can you please elaborate more  
345 on discrepancy between the measurements and the simulation at the outer 30%. Is the  
346 tip loss factor affecting outer 30% in the simulations?

347 This is correct, the tip loss correction drives down the angle of attack close to the tip. We  
348 added this information and restructured the explanation:

349 In close vicinity to the blade tip ( $0.9 < r/R < 1$ ) the modelling of the tip loss effect leads to  
350 deviations between the measurements and the BEM simulations. The two outermost  
351 measurement points should be treated with care since the tip loss effect influences the  
352 bisectrix method by Herráez et al. (2018).

353 **Page 25, figure 14:** Please check the caption, both left and right, and (a) and (b) are used  
354 for the subfigures.

355 We removed "right" and "left" from the caption.

356 **Page 26, figure 16:** Please make the caption clearer for indicating top and bottom panels  
 357 of the subfigures (a) and (b).

358 As also requested by referee 1, we added abbreviations to the figures to clarify the rotor  
 359 type.

360

361 **Appendix- updated figures:**

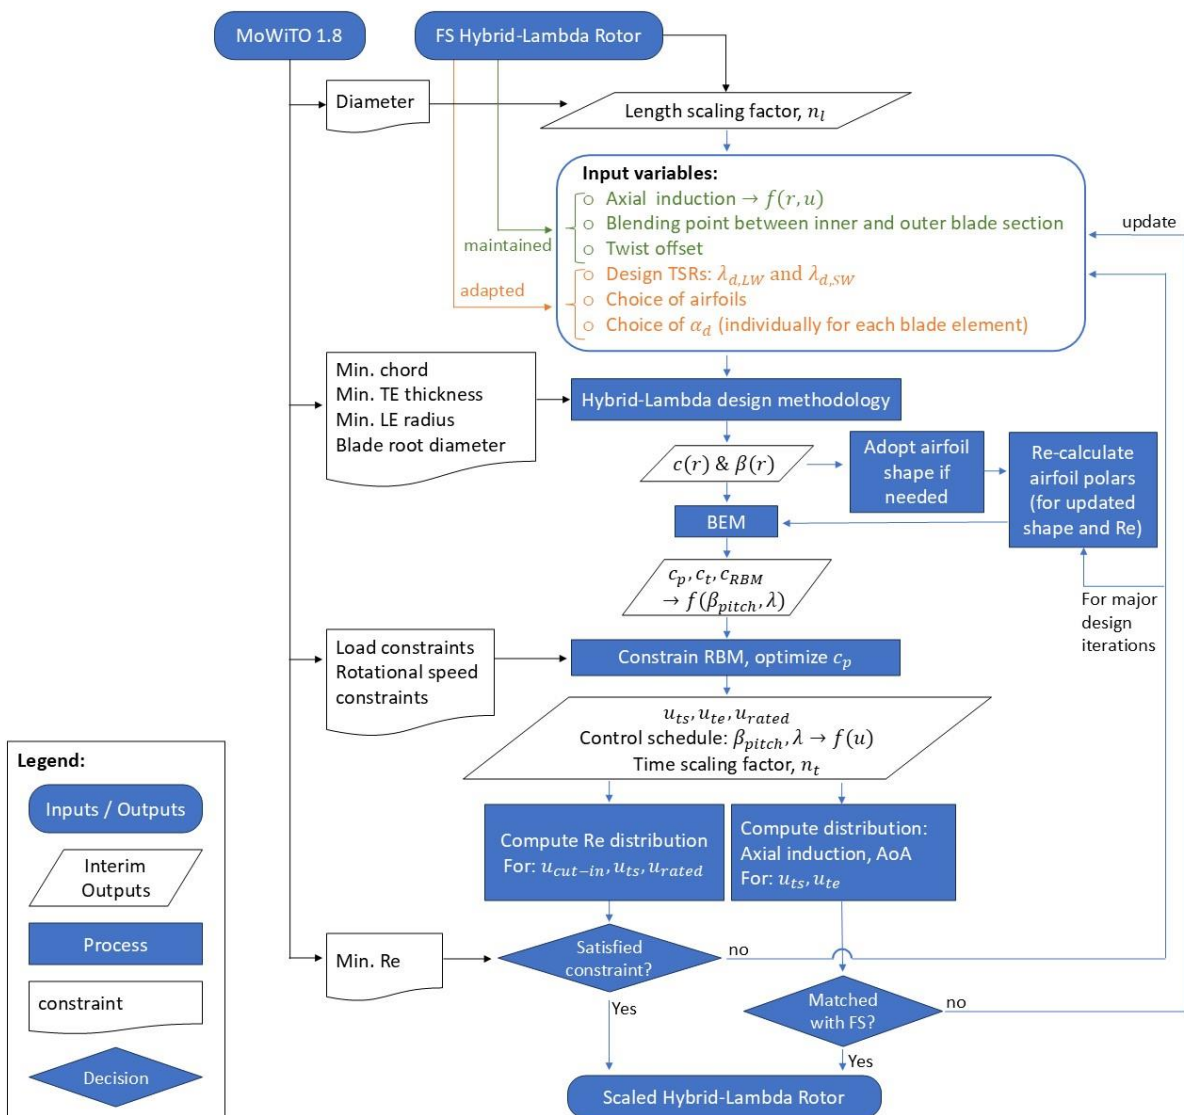

362

363 **Figure 2:** Scaling and design workflow for the Hybrid-Lambda Rotor. [...]

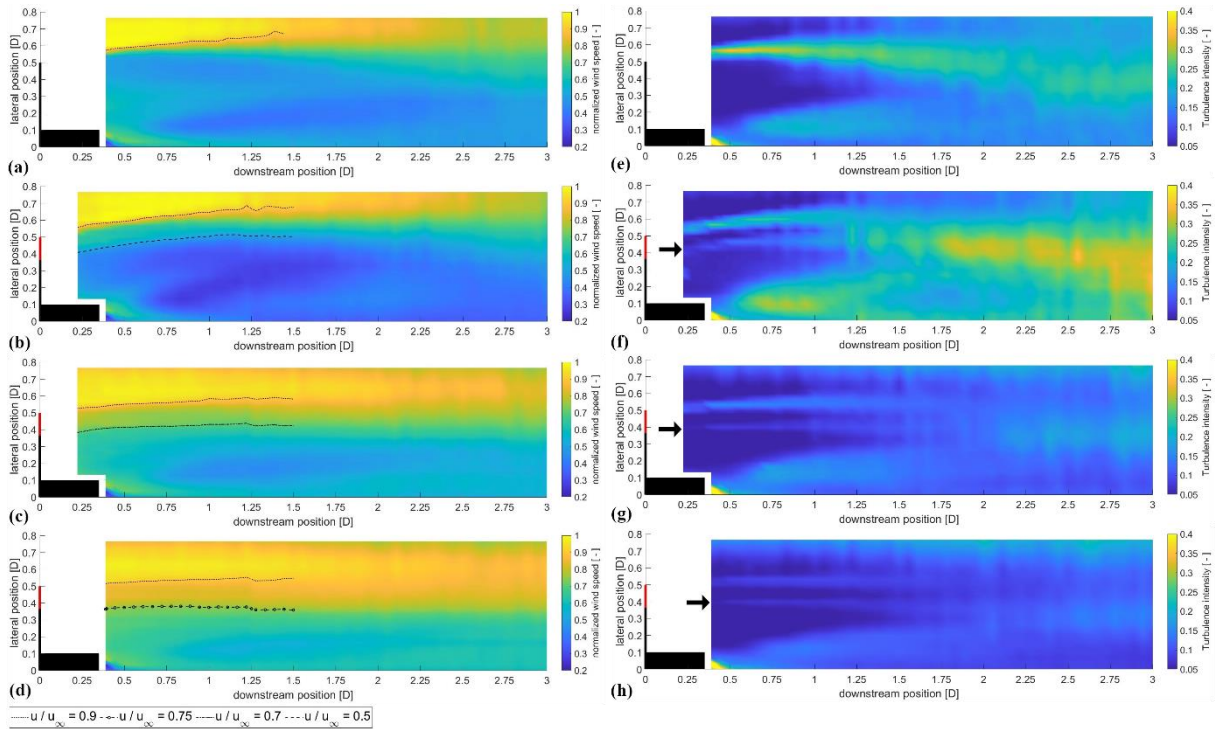

364

365 **Figure 13.** Mean normalized wind speed (a-d) and turbulence intensity (e-h) from hot-wire  
 366 measurements in the wake of the model turbines. From top to bottom: Conventional rotor (a,e),  
 367 Hybrid-Lambda Rotor in LW mode (b,f), SW mode (c,g) and at rated wind speed (d,h). Nacelle and  
 368 blades are displayed in black, the outer 30% of the Hybrid-Lambda blades are displayed in red. The  
 369 black arrows point at the second shear layer starting at the blade design blending region.

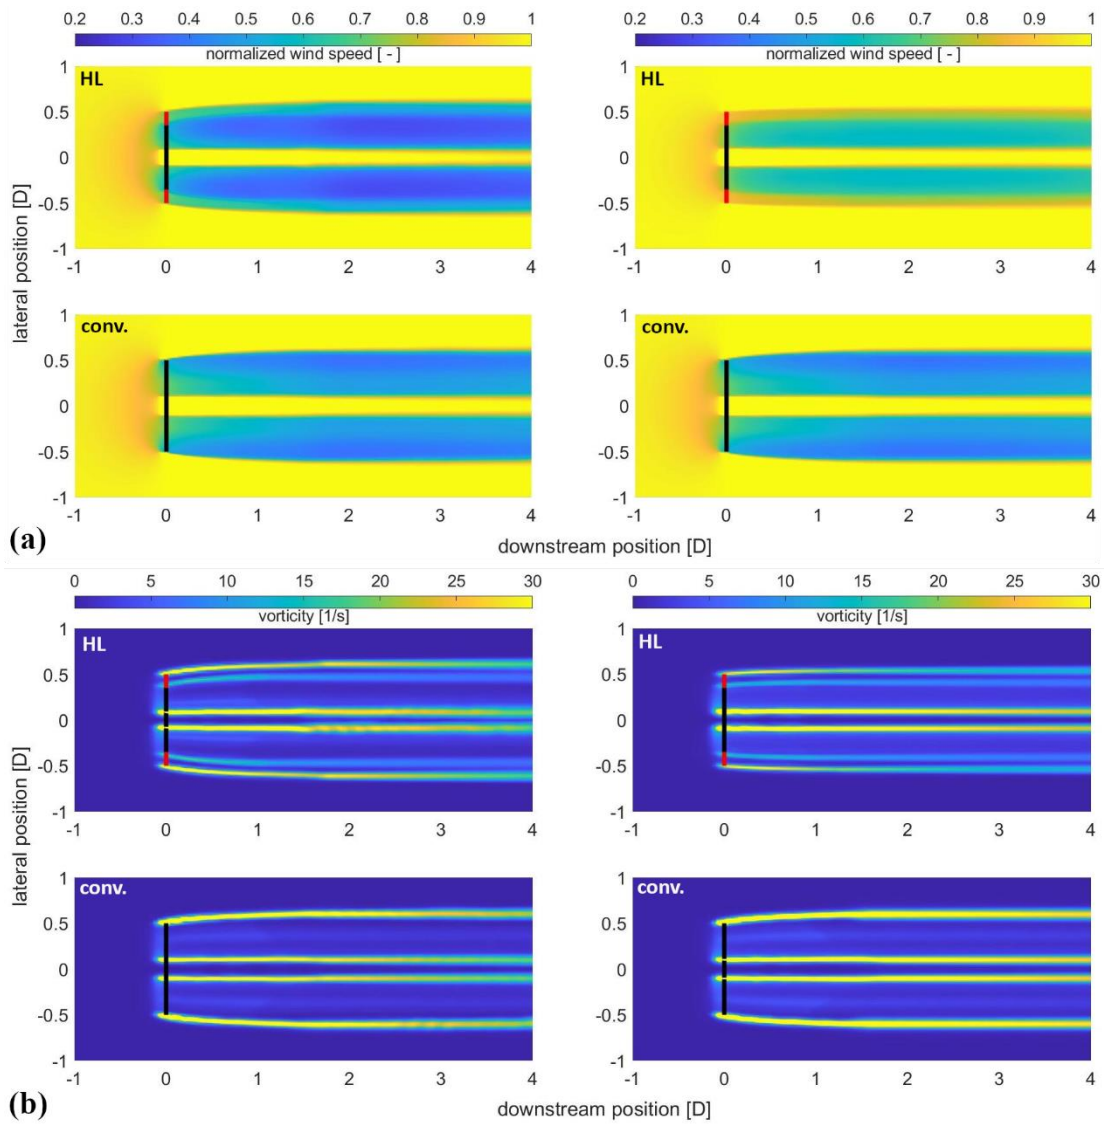

370

371 **Figure 15.** Normalized wind speed (a) in light-wind (left) and strong-wind mode (right). Vorticity  
 372 magnitude (b) in light-wind (left) and strong-wind mode (right), for the Hybrid-Lambda model  
 373 turbine (top) and the conventional model turbine (bottom) from FVW simulations.
